# Supplementary material for: Exploring factors influencing uptake and adherence to a home-based prehabilitation physical activity and exercise intervention for patients undergoing chemotherapy before major surgery (ChemoFit): a qualitative study
Source: HighWire-hosted journal article supplement (doi:10.1136/bmjopen-2022-062526), 2022-09-01
Supplement: bmjopen-2022-062526supp001_data_supplement.pdf [file bmjopen-2022-062526supp001_data_supplement.pdf]

### ChemoFit Study – Topic Guide

|    |                                                                                                                                                                                                                       |
|----|-----------------------------------------------------------------------------------------------------------------------------------------------------------------------------------------------------------------------|
| 1  | I would like to start by asking what motivated you to take part in this home-based exercise programme? (Prompt: what information did you receive specifically that meant this programme appealed to you?)             |
| 2  | Could you tell me about anything that you particularly liked or disliked about the programme?                                                                                                                         |
| 3  | What kept you motivated to keep going with the programme?                                                                                                                                                             |
| 4  | What sort of information do you believe was essential to help you make a decision about whether to take part or not? (Prompt: What information (if any) do you think was needed that you didn't receive?)             |
| 5  | Which part of the exercise programme did you find most easy to follow and complete? (e.g., increasing step count, strengthening exercises)                                                                            |
| 6  | Did anyone need any extra support to complete the exercise programme at home (Prompt: who/where from)?                                                                                                                |
| 7  | Did anyone use any sort of equipment while taking part in the programme? (Prompt: clothing, activity monitors). What else might have been useful?                                                                     |
| 8  | What are your thoughts about undergoing a series of examinations before and after completing the exercise programme? (Prompt: what are the advantages/disadvantages; provide reassurance? Are they needed long-term?) |
| 9  | Are there any barriers to completing the exercise programme at home? (Prompt: other health problems; time, costs, need for support [practical/emotional])                                                             |
| 10 | Did anyone have any anxieties about completing the exercise programme at home?                                                                                                                                        |
| 11 | What were your expectations of the exercise programme? Did you achieve what you wanted to?                                                                                                                            |
| 12 | Would you recommend this programme to other patients? (Prompt: If yes, why? If no, why not?)                                                                                                                          |
